# Supplementary material for: Renal Ischemia/Reperfusion Early Induces Myostatin and PCSK9 Expression in Rat Kidneys and HK-2 Cells
Source: MDPI journal article supplement (doi:10.3390/ijms22189884), 2021-09-13
Supplement: s1 [file s1]

## Supplementary figures

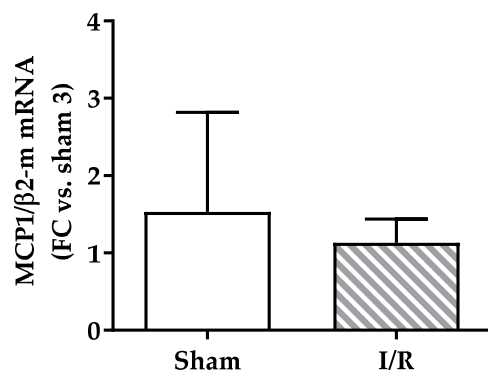

**Figure S1.** MCP-1 mRNA expression after 4 hours of reperfusion by quantitative real-time PCR. The results have been normalized by expressing the number of transcript copies as a ratio to β2-microglobulin (β2-m) and indicated as fold changes (FC) in respect to kidneys from sham-operated rat (#3).

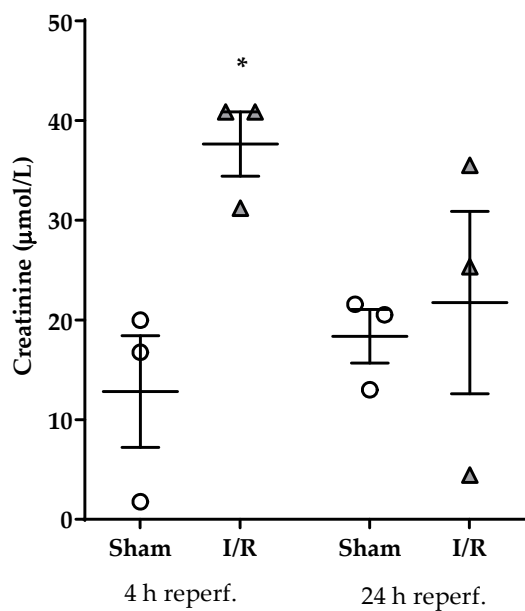

**Figure S2.** Plasma creatinine levels in rats undergone to sham intervention (circle) or I/R (triangle) after 4 h and 24 h of reflow; \*  $p < 0.05$ .

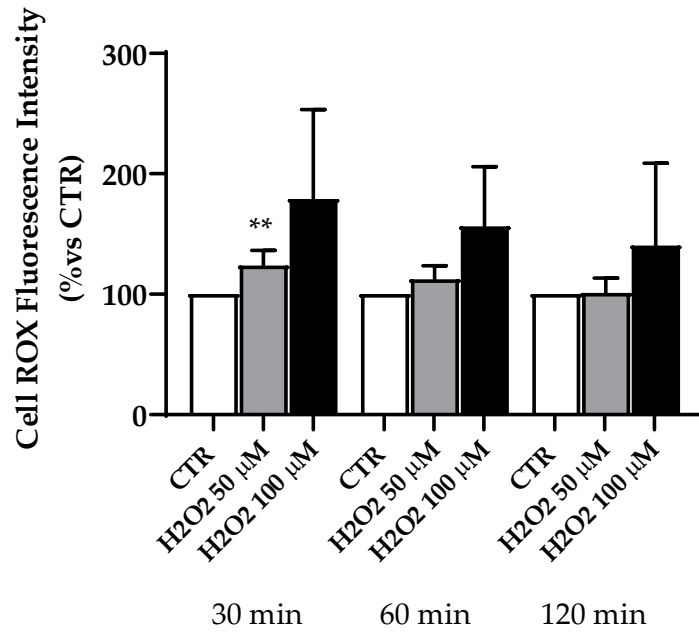

**Figure S3.** Quantification of cell ROS production by HK-2 cells after 30, 60, and 120 min of incubation with H<sub>2</sub>O<sub>2</sub> using the CellROX™ kit (\*\* $p < 0.01$ ).

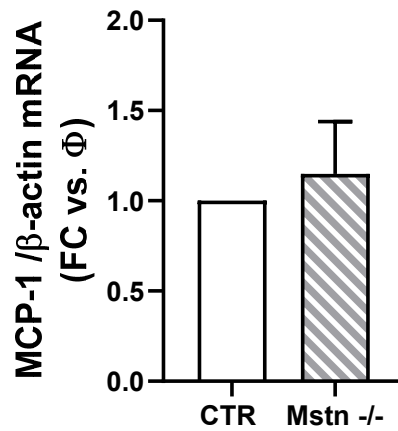

**Figure S4.** MCP-1 mRNA levels in Mstn siRNA cells after 3 hours of ischemia by quantitative real-time PCR. The results have been normalized by expressing the number of transcript copies as a ratio to  $\beta$ -actin and indicated as fold changes (FC) in respect to control siRNA cells.
